# Supplementary material
Source: ML conference proceedings conference paper supplement (https://aclanthology.org/2020.findings-emnlp.239)
Supplement: OptionalSupplementaryMaterial [file 2020.findings-emnlp.239.OptionalSupplementaryMaterial.pdf]

|                              | TINY  | SMALL |
|------------------------------|-------|-------|
| Nbs of heads                 | 1     | 6     |
| $N_d$                        | 2     | 4     |
| $N_u$                        | 2     | 4     |
| $T$                          | 50    | 50    |
| $C$                          | 5     | 5     |
| $\mathcal{T}_d$ nbs of heads | 6     | 6     |
| Inner dimension              | 768   | 768   |
| Model Dimension              | 768   | 768   |
| Vocab length                 | 32000 | 32000 |
| $\mathcal{T}_d$ : Emb. size  | 768   | 768   |
| $d_k$ :                      | 64    | 64    |
| $d_v$ :                      | 64    | 64    |

Table 8: Architecture hyperparameters used for the hierarchical pre-training.

## A Additional Details on data composing SILICONE

In this section, we illustrate the diversity of the dataset composing SILICONE. In Figure 3, we plot two histograms representing the different utterance lengths for DA and E/S. As expected, for spoken dialog, lengths are shorter than for written benchmarks (e.g., GLUE).

## B Additional Details for Models

In this section we report model hyperparameters and as well as additional descriptions of our baselines. For all models we use a tokenizer based on WordPiece (Wu et al., 2016).

We also provide a concrete example of corrupted context for the MLM Loss.

### B.1 Hierarchical pre-training

We report in Table 8 the main hyperparameters used for our model pre-training. We used GELU (Hendrycks and Gimpel, 2016) activations and the dropout rate (Srivastava et al., 2014) is set to 0.1.

### B.2 MLM Loss example

In this section we propose a visual illustration of the corrupted context Figure 4 by the MLM Loss.

### B.3 Experimental Hyper-parameters for SILICONE

For all models, we use a batch size of 64 and automatically select the best model on the

validation set according to its loss. We do not perform exhaustive grid search either on the learning rate (that is set to  $10^{-4}$ ), nor on other hyper-parameters to perform a fair comparison between all the models. We use ADAMW (Kingma and Ba, 2014; Loshchilov and Hutter, 2017) with a linear scheduler on the learning rate and the number of warm-up steps is set to 100.

## B.4 Additional Details on Baselines

A representation for all the baselines can be found in Figure 5. For all models, both hidden dimension and embedding dimension is set to 768 to ensure fair comparison with the proposed model. The MLP used for decoding contains 3 layers of sizes (768, 348, 192). We use RELU (Agarap, 2018) to introduce non linearity inside our architecture.

## C Additional Experimental Results

In this section we report the detailed results on SILICONE, including the ones presented in Table 4. We report results on two new experiments: importance of pre-training time for both a TINY and SMALL model, we report the convergence time of a TINY model and finally we extend subsection 5.2.3 by reporting results on IEMO.

### C.1 Detailed Results on SILICONE

We show in Table 9 the results on the SILICONE benchmark for all the models mentioned in the paper.

### C.2 Improvement over pre-training

In this experiment we illustrate how pre-training improves performance on SEM (see Figure 6). As expected accuracy improves when pre-training.

### C.3 Multi level Supervision for pre-training MELD

In this experiment we report results of the experiment mentioned in subsection 5.2.3. In this experiment we see that the training process seems to be noisier for fractions lower than 40%. For larger percentages, we observe that including higher supervision (at the dialog level) during pre-training leads to a consistent improvement.

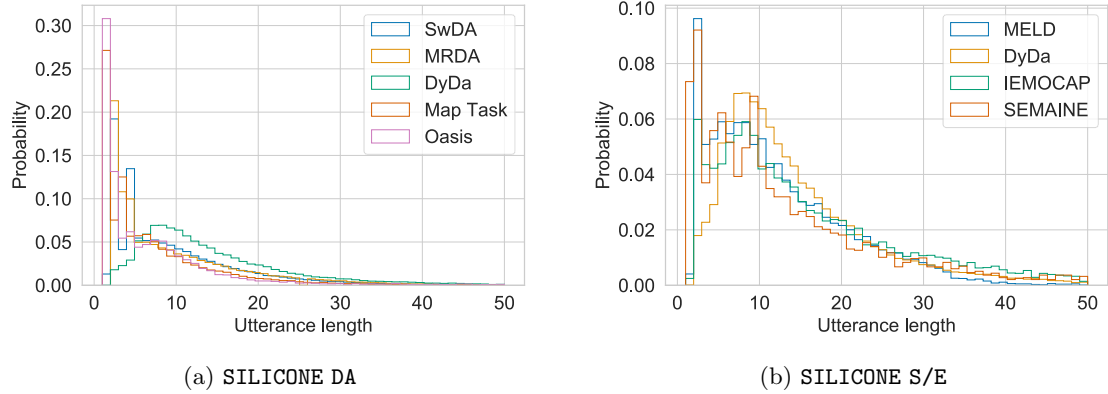

Figure 3: Histograms showing the utterance length for each dataset of SILICONE.

$u_1$  Can I get a beer .  
 $u_2$  Hey , did you pick a roommate ?  
 $u_3$  You betcha ?  
 $u_4$  Is it the Italian guy ?  
 $u_5$  Um-m , yea right !

(a) Initial context composed by 5 utterances.

$u_1$  Can I get a beer .  
 $u_2$  Hey , did you pick a roommate ?  
 $u_3$  You betcha ?  
 $u_4$  Is it the Italian guy ?  
 $u_5$  Um-m , yea right !

(b)  $u_1$  is chosen to be masked.

$u_1$  [MASK] [MASK] [MASK] [MASK] [MASK] [MASK]  
 $u_2$  Hey , did you pick a roommate ?  
 $u_3$  You betcha ?  
 $u_4$  Is it the Italian guy ?  
 $u_5$  Um-m , yea right !

(c) Corrupted context with utterance  $u_1$  masked.

$u_1$  Can I get a beer .  
 $u_2$  Hey , did you pick a roommate ?  
 $u_3$  You betcha ?  
 $u_4$  Is it the Italian guy ?  
 $u_5$  Um-m , yea right !

(d)  $u_4$  is chosen to be masked.

$u_1$  Can I get a beer .  
 $u_2$  Hey , did you pick a roommate ?  
 $u_3$  You betcha ?  
 $u_4$  [MASK] [MASK] [MASK] [MASK] [MASK] [MASK]  
 $u_5$  Um-m , yea right !

(e) Corrupted context with utterance  $u_4$  masked.

Figure 4: This figure shows an example of corrupted context. Here  $p_C$  is randomly set to 2 meaning that two utterances will be corrupted.  $u_1$  and  $u_4$  are randomly picked in 4b, 4d and then masked in 4c, 4e.

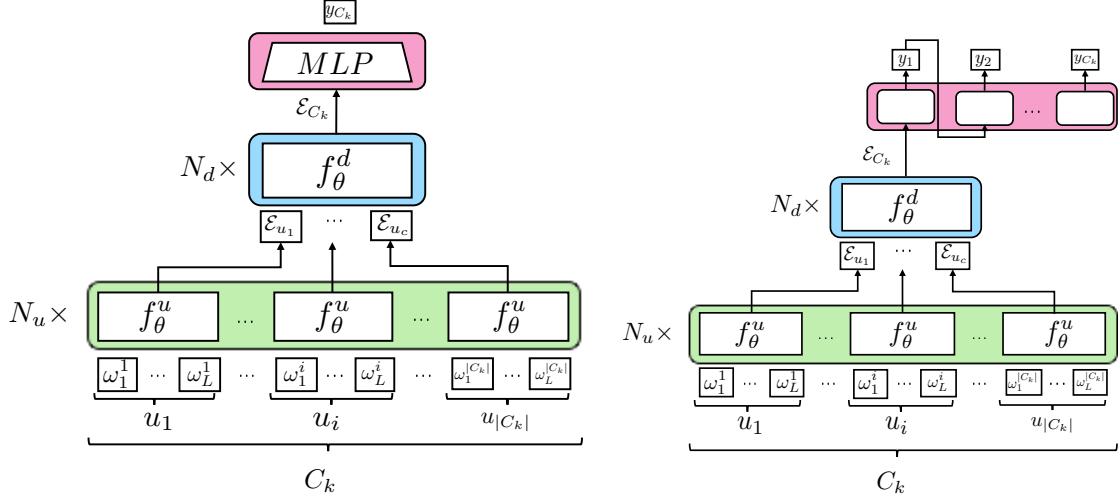

(a) Hierarchical encoder with MLP decoder performing single label prediction.

(b) Hierarchical encoder with sequential decoder (either GRU or CRF).

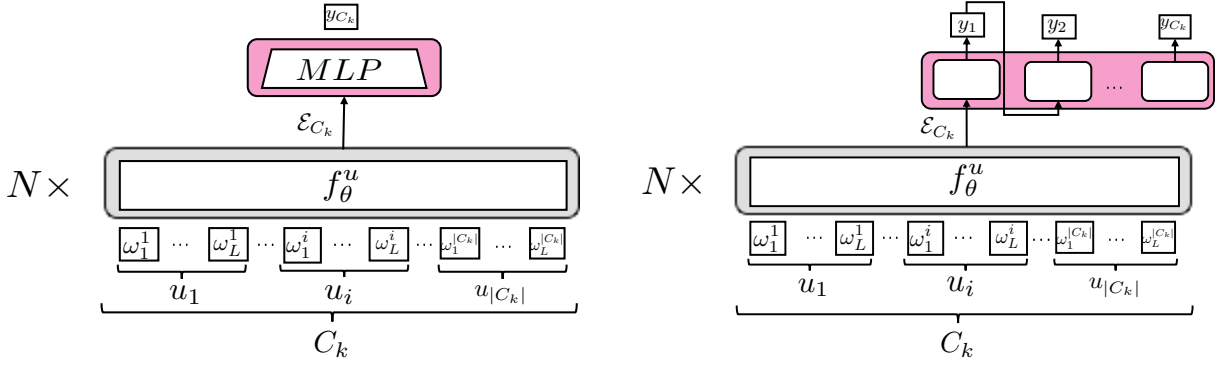

(c) BERT encoder with MLP decoder performing single label prediction.

(d) BERT encoder with sequential decoder (either GRU or CRF)

Figure 5: Schema of the different models evaluated on SILICONE. In this figure  $f_\theta^u$ ,  $f_\theta^d$  and the sequence label decoder ( $g_\theta^{dec}$ ) are respectively colored in green, blue and red for the hierarchical encoder (see Figure 5a and Figure 5d). For BERT there is no hierarchy and embedding is performed through  $f_\theta^u$  colored in grey (see Figure 5c, Figure 5d)

|                                            | <b>Avg</b> | SwDA | MRDA | DyDA <sub>DA</sub> | MT   | Oasis | DyDA <sub>e</sub> | MELD <sub>s</sub> | MELD <sub>e</sub> | IEMO | SEM  |
|--------------------------------------------|------------|------|------|--------------------|------|-------|-------------------|-------------------|-------------------|------|------|
| BERT-4layers (+MLP)                        | 69.45      | 77.8 | 90.7 | 79.0               | 88.4 | 66.8  | 90.3              | 49.3              | 50.4              | 43.0 | 58.8 |
| BERT (+MLP)                                | 72.79      | 79.2 | 90.7 | 82.6               | 88.2 | 66.9  | 91.9              | 59.3              | 61.4              | 45.0 | 62.7 |
| BERT (+GRU)                                | 69.84      | 78.2 | 90.4 | 80.8               | 88.7 | 63.7  | 90                | 50.4              | 48.9              | 45.0 | 62.3 |
| BERT (+CRF)                                | 72.8       | 79.0 | 90.8 | 88.3               | 67.2 | 81.9  | 91.5              | 59.4              | 61.0              | 44.2 | 61.5 |
| $\mathcal{HR}$ (+MLP)                      | 69.77      | 77.5 | 90.9 | 80.1               | 82.8 | 64.3  | 91.5              | 59.3              | 59.9              | 40.3 | 51.1 |
| $\mathcal{HR}$ (+GRU)                      | 67.54      | 78.2 | 90.9 | 79.9               | 84.4 | 63.5  | 91.5              | 50.7              | 50.4              | 35.2 | 50.7 |
| $\mathcal{HR}$ (+CRF)                      | 70.5       | 77.8 | 91.3 | 79.7               | 87.5 | 65.3  | 91.1              | 62.1              | 57.4              | 42.1 | 50.7 |
| $\mathcal{HT}(\theta_{MLM}^{u,d})$ (TINY)  | 73.3       | 79.3 | 92.0 | 80.1               | 90.0 | 68.3  | 92.5              | 62.6              | 59.9              | 42.0 | 66.6 |
| $\mathcal{HT}(\theta_{MLM}^d)$ (TINY)      | 72.4       | 78.5 | 91.8 | 78.0               | 89.8 | 66.0  | 92.5              | 62.6              | 59.3              | 42.0 | 63.5 |
| $\mathcal{HT}(\theta_{MLM}^u)$ (TINY)      | 72.4       | 78.6 | 91.8 | 79.0               | 89.8 | 65.0  | 91.8              | 61.8              | 58.1              | 39.2 | 68.9 |
| HBERT (w) $\theta_{BERT_{mlmil}}$ (TINY)   | 70.8       | 77.6 | 91.4 | 79.3               | 88.3 | 65.8  | 91.9              | 58.0              | 56.3              | 40.0 | 59.1 |
| $\mathcal{HT}(\theta_{MLM}^{u,d})$ (SMALL) | 74.32      | 79.2 | 92.4 | 81.5               | 90.6 | 69.4  | 92.7              | 64.1              | 60.1              | 45.0 | 68.2 |
| $\mathcal{HT}(\theta_{GAP}^d)$ (TINY)      | 71.58      | 78.6 | 91.8 | 78.1               | 89.3 | 64.1  | 91.6              | 60.5              | 55.7              | 42.2 | 63.9 |
| $\mathcal{HT}(\theta_{GAP}^u)$ (TINY)      | 71.52      | 78.5 | 90.9 | 79.0               | 88.9 | 66.3  | 92.0              | 59.2              | 57.5              | 39.9 | 63.0 |

Table 9: Performances of all mentioned model with different decoders such as MLP, GRU, CRF SILICONE. The datasets are grouped by label type (DA vs E/S) and order by decreasing size.

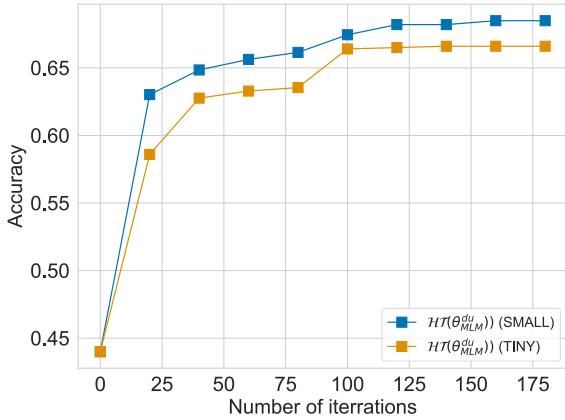

Figure 6: Illustration of improvement of accuracy during pre-training stage on SEM for both a TINY and SMALL model.

## D Negative Results on GAP

We briefly describe few ideas we tried to make GAP works at both the utterance and dialog level. We hypothesise that:

- giving the same weight to the utterance level and the dialog level (see Equation 3) was responsible of the observed plateau. Different combinations lead to fairly poor improvements.
- the limited model capacity was part of the issue. Larger models does not give the expected results.

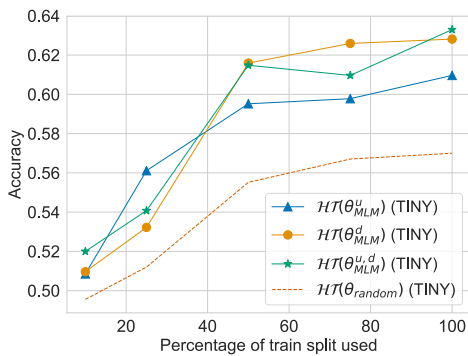

Figure 7: A comparison of different parameters initialisation on MELD<sub>s</sub>. Training is performed using a different percentage of complete training set. Validation and test set are fixed over all experimentation. Each score is the averaged accuracy over 10 random runs.
